# Supplementary material for: A rapid and simple electrochemical detection of the free drug concentration in human serum using boron-doped diamond electrodes
Source: Royal Society of Chemistry journal article supplement (doi:10.1039/d2an01037b), 2022-01-01
Supplement: d2an01037b1.pdf [file d2an01037b1.pdf]

*Electronic Supplementary Information*

## **A rapid and simple electrochemical detection of the free drug concentration in human serum using boron-doped diamond electrodes**

Hideto Moriyama<sup>1‡</sup>, Genki Ogata<sup>1‡</sup>, Haruma Nashimoto<sup>2</sup>, Seishiro Sawamura<sup>3</sup>, Yoshiaki Furukawa<sup>1</sup>, Hiroshi Hibino<sup>3</sup>, Hiroyuki Kusuhara<sup>2</sup>, Yasuaki Einaga<sup>1\*</sup>

<sup>1</sup>Department of Chemistry, Keio University, 3-14-1 Hiyoshi, Yokohama 223-8522, Japan

<sup>2</sup>Laboratory of Molecular Pharmacokinetics, Graduate School of Pharmaceutical Sciences, The University of Tokyo, 7-3-1 Hongo, Bunkyo, Tokyo 113-0033, Japan

<sup>3</sup>Division of Global Pharmacology, Department of Pharmacology, Graduate School of Medicine, Osaka University, 2-2 Yamadaoka, Suita, Osaka 565-0871, Japan

‡Contributed equally

\*Corresponding author

E-mail: [einaga@chem.keio.ac.jp](mailto:einaga@chem.keio.ac.jp)

### **Contents**

|           |                                                                                                                              |
|-----------|------------------------------------------------------------------------------------------------------------------------------|
| Figure S1 | Raman spectrum of BDD.                                                                                                       |
| Figure S2 | SEM image of BDD electrode.                                                                                                  |
| Figure S3 | Cyclic voltammogram of PB using BDD.                                                                                         |
| Figure S4 | Illustrated outline of 3 electrode systems.                                                                                  |
| Figure S5 | LC/MS/MS chromatograms of doxorubicin.                                                                                       |
| Figure S6 | Calibration curve of doxorubicin using LC/MS/MS.                                                                             |
| Figure S7 | Linear sweep voltammograms of doxorubicin in 0.1 M PB (pH 7.4) with nitrogen bubbling using BDD and GC.                      |
| Figure S8 | Linear sweep voltammogram of doxorubicin at three different pH.                                                              |
| Figure S9 | Calibration curves of doxorubicin using LSV<br>(for the unbound concentration measurements).                                 |
| Table S1  | Optimised parameters for mass spectrometric analysis.                                                                        |
| Table S2  | Average current ( $\mu\text{A}$ ), SD ( $\mu\text{A}$ ) and CV (%) values for each calibration measurement using BDD-A and B |
| Table S3  | Comparison of electrochemical measurement results of doxorubicin with various electrodes                                     |

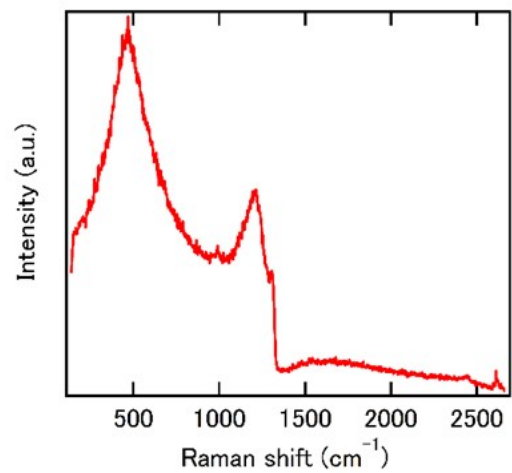

**Figure S1.** Raman spectrum of BDD.

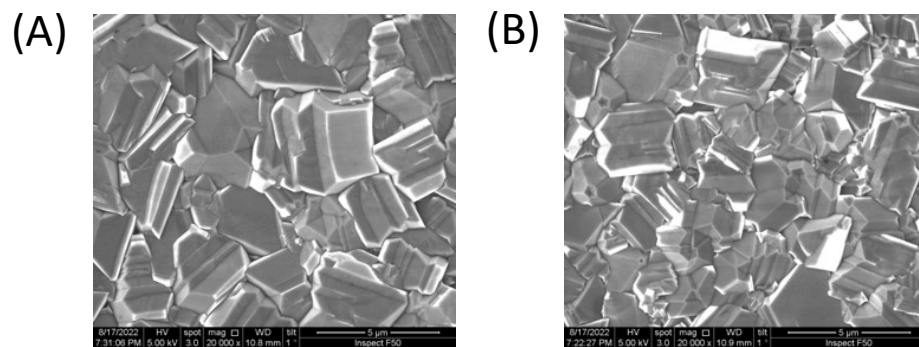

**Figure S2.** SEM image of BDD electrode. (A)BDD-A, (B)BDD-B

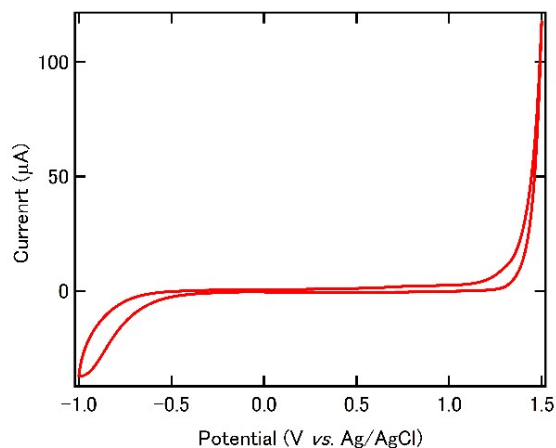

**Figure S3.** Cyclic voltammogram of 0.1 M PB (pH 7.4) using BDD. Start potential: 0 V vs. Ag/AgCl; Scan range: -1.0 V to 1.5 V; Scan rate: 100 mV s<sup>-1</sup>

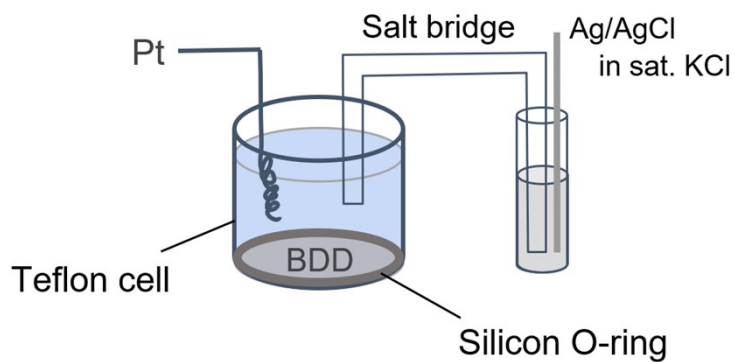

**Figure S4.** Illustrated outline of 3 electrode systems. A silicone O-ring is sandwiched between the cell and the BDD).

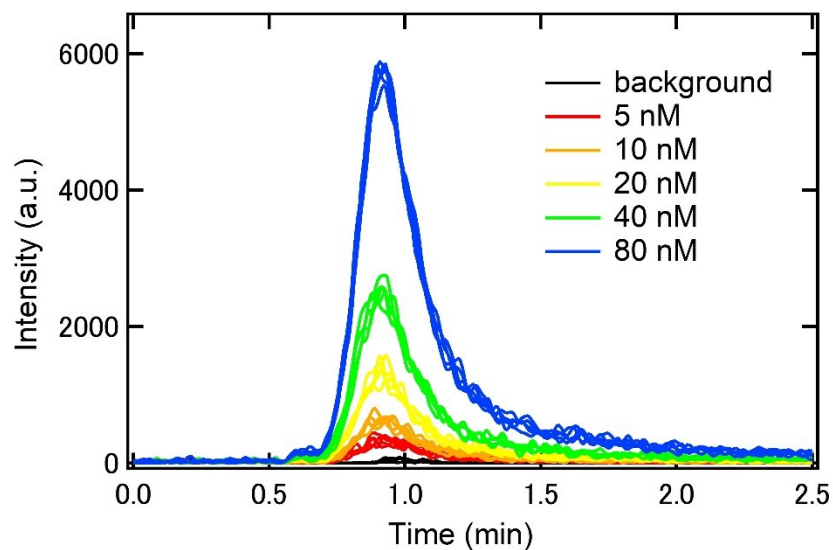

**Figure S5.** LC/MS/MS chromatograms of doxorubicin. Concentration range: 0, 5, 10, 20, 40, 80 nM, QC: 5, 20, 80 nM,  $m/z=397.05$ .

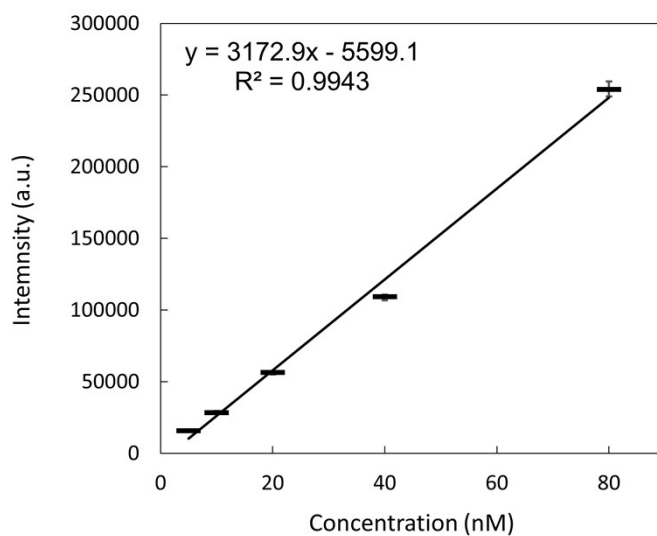

**Figure S6.** Calibration curve of doxorubicin using LC/MS/MS. LOD=0.188 nM (LOD = 3.3 sd of background area / slope), mean  $\pm$  s.e.m.,  $n = 5$ .

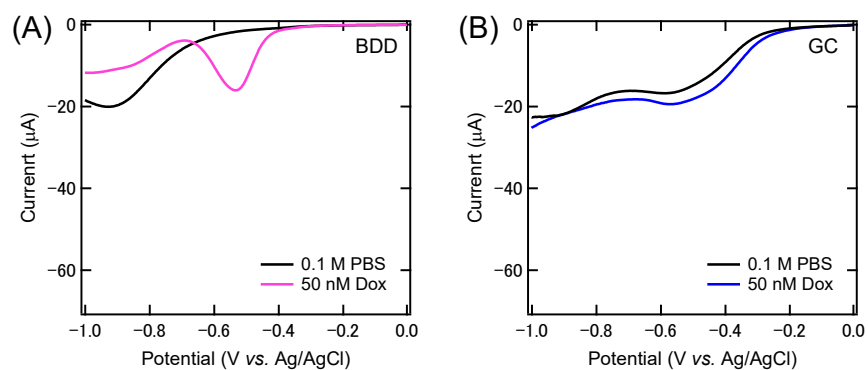

**Fig. S7.** Linear sweep voltammograms of doxorubicin in 0.1 M PB (pH 7.4) by BDD and GC with the 1 min N<sub>2</sub> bubbling. (A) BDD, in the absence (black line) and the presence of 50 nM doxorubicin (DOX, magenta line). (B) GC, in the absence (black line) and the presence of 50 nM doxorubicin (DOX, blue line).

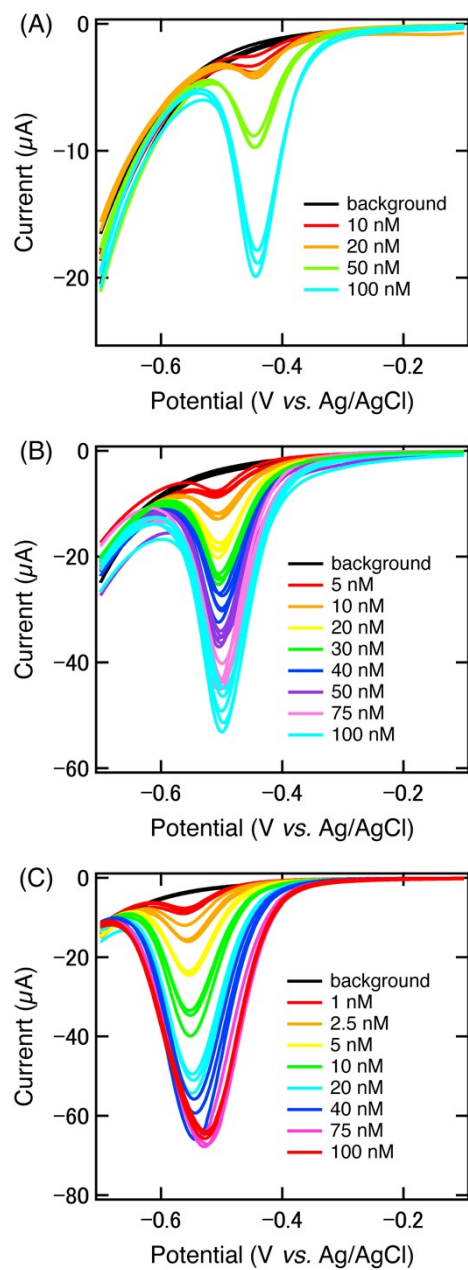

**Figure S8.** Linear sweep voltammogram of doxorubicin at three different pH.

(A) pH 5.1 (10, 20, 50, 100 nM in 0.1 M acetate buffer,  $n = 3$ ); (B) pH 6.0 (5, 10, 20, 30, 40, 50, 75, 100 nM doxorubicin in 0.1 M PB,  $n = 5$ ); (C) pH 7.4 (1, 2.5, 5, 10, 20, 40, 75, 100 nM doxorubicin in 0.1 M PB,  $n = 3$ ), Scan rate:  $100 \text{ mV s}^{-1}$ .

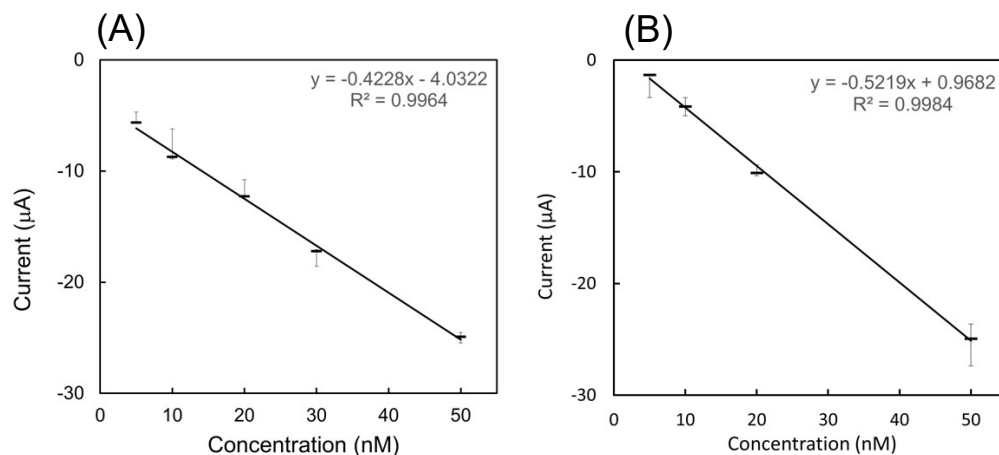

**Figure S9.** Calibration curves of doxorubicin in 0.1 M PB (pH 6.0) at each electrode using LSV. Measurements were performed just before the unbound concentration measurements. (A) BDD-A, (B) BDD-B, mean  $\pm$  s.e.m.,  $n = 3$ .

**Table S1. Optimised** parameters for mass spectrometric analysis.

| Parameter                | Doxorubicin    |
|--------------------------|----------------|
| Ionization method        | ESI (positive) |
| Nebulizing gas flow      | 3 L/min        |
| Heating gas flow         | 10 L/min       |
| Drying gas flow          | 10 L/min       |
| Interface temperature    | 300 °C         |
| DL temperature           | 250 °C         |
| Block heater temperature | 400 °C         |
| CID gas pressure         | 270 kPa        |
| Interface voltage        | +4 kV          |
| Q1 Pre Bias              | -26.0 V        |
| Collision energy         | -15.0 V        |
| Q3 Pre Bias              | -20.0 V        |

**Table S2.** Average current ( $\mu\text{A}$ ), SD ( $\mu\text{A}$ ) and CV (%) values for each calibration measurement using BDD-A and B

| Added (nM) | BDD-A                     |                      |        | BDD-B                     |                      |        |
|------------|---------------------------|----------------------|--------|---------------------------|----------------------|--------|
|            | Average ( $\mu\text{A}$ ) | SD ( $\mu\text{A}$ ) | CV (%) | Average ( $\mu\text{A}$ ) | SD ( $\mu\text{A}$ ) | CV (%) |
| 5          | -9.4                      | 0.47                 | 5.0    | -8.1                      | 0.96                 | 11.9   |
| 10         | -12.5                     | 1.24                 | 9.9    | -10.9                     | 0.67                 | 6.1    |
| 20         | -16.1                     | 0.71                 | 4.4    | -16.9                     | 0.41                 | 2.4    |
| 30         | -20.1                     | 0.68                 | 3.2    | —                         | —                    | —      |
| 50         | -28.7                     | 0.38                 | 1.3    | -31.7                     | 1.56                 | 4.9    |

**Table S3.** Comparison of electrochemical measurement results of doxorubicin with various electrodes

| Material for sensing                                              | Technique | Detection range / $\mu\text{M}$   | LOD /nM | Sample                   | Ref. |
|-------------------------------------------------------------------|-----------|-----------------------------------|---------|--------------------------|------|
| AgNPs-CDS-rGO/GCE                                                 | DPV       | 0.01~2.5                          | 2       | Human serum              | [1]  |
| Nano-TiO <sub>2</sub> /nafion composite film modified GCE         | LSV       | 0.005~2                           | 1       | Plasma                   | [2]  |
| Thin film of poly-arginine modified GCE                           | DPV       | 0.069~1.08                        | 69      | Whole plasma             | [3]  |
|                                                                   |           | 0.1~3.45                          | 103     | Whole blood              |      |
| MWCNT/CoFe <sub>2</sub> O <sub>4</sub> nanoparticles modified CPE | DPV       | 5×10 <sup>-5</sup> ~1.15          | 0.01    | Human blood serum, urine | [4]  |
| PAMT@AuNPs@rGO/GCE                                                | DPV       | 3×10 <sup>-5</sup> ~0.03, 0.03~30 | 0.009   | Blood serum              | [5]  |
| VMSF/ErGO layer on GCE                                            | DPV       | 0.001~20                          | 0.77    | Human whole blood        | [6]  |
| MCS/rGO/GCE                                                       | DPV       | 0.01~10                           | 1.5     | Human serum              | [7]  |
| AuNRDs/1T-MoS <sub>2</sub> nanosheets /SPE                        | AdsDPV    | 0.01~9.5                          | 2.5     | Human blood serum        | [8]  |



|                                                             |                    |                         |       |                                             |              |
|-------------------------------------------------------------|--------------------|-------------------------|-------|---------------------------------------------|--------------|
| $\gamma$ -GSH-MoS <sub>2</sub> -CYS/GCE                     | DPV                | 0.1~78.3,<br>98.3~1218  | 31    | –                                           | [9]          |
| FeV/SCNFs/GCE                                               | CV                 | 0.02~542.5              | 5.2   | Blood serum, human<br>urine                 | [10]         |
| Graphene quantum dots/GCE                                   | DPV                | 0.018~3.6               | 0.016 | Human plasma                                | [11]         |
| Au/N-prGO-CS electrode                                      | DPV                | 0.01~15                 | 10    | Human plasma                                | [12]         |
| DRN-aptamer-modified electrode                              | EIS                | 0.031~0.125             | 28    | –                                           | [13]         |
| PT/ $\beta$ -CD/GQD modified Au electrode                   | DPV                | 0.086~3.45              | 12    | Human plasma                                | [14]         |
| Poly(Azure B)-DNA composite modified GCE                    | DPV                | $1 \times 10^{-4}$ ~0.1 | 0.07  | Human serum                                 | [15]         |
| BNNS-NiCo <sub>2</sub> O <sub>4</sub> /SPE                  | DPV                | 0.01~600                | 9.4   | Injection solution,<br>biological specimens | [16]         |
| Fe <sub>3</sub> O <sub>4</sub> @Pt nanoparticles/ MWCNT/CPE | DPV                | 0.05~70                 | 1     | Urine sample                                | [17]         |
| N-doped carbon nanooxions/ GCE                              | DPV                | $2 \times 10^{-4}$ ~10  | 0.06  | Serum sample                                | [18]         |
| NiHCF/Ni-Al-LDH modified gold electrode                     | DPV                | 0.01~6.2                | 1.9   | Biological sample,<br>human blood serum     | [19]         |
| GCE-AgNPs/poly(chitosan)                                    | DPV                | 0.103~8.6               | 103   | Human bio-fluids,<br>B16F10 cell lysates    | [20]         |
| VMSF/chemically pretreated- GCE                             | DPV                | $5 \times 10^{-4}$ ~23  | 0.2   | Human whole blood                           | [21]         |
| rGO/AuNPs/polypyrrole/GCE                                   | DPV                | 0.02~25000              | 20    | –                                           | [22]         |
| SNPs@MOF/BNSs-Fc/GCE                                        | Ratiometric<br>SWV | 0.01~10                 | 2     | Human serum                                 | [23]         |
| BDD                                                         | LSV                | 0.001~0.1               | 0.14  | Human serum                                 | This<br>work |

**Abbreviations:** AgNPs, silver nanoparticles; CDs, carbon dots; rGO, reduced graphene oxide; GCE, glassy carbon electrode; DPV, differential pulse voltammetry; LSV, linear sweep voltammetry; CPE, carbon nanotube paste electrode; MWCNT, multi-walled carbon nanotubes; PAMT, poly(2-amino-5-mercapto-1,3,4-thiadiazole); VMSF, vertically-ordered mesoporous silica-nanochannel film; ErGO, electrochemically reduced graphene oxide; MCS, mesoporous carbon nanospheres; AuNRDs, gold nanorods; AdsDPV, adsorptive stripping differential pulse voltammetry; SPE, screen-printed electrode;  $\gamma$ -GSH,  $\gamma$ -glutathione; CYS, cystamine; CV, cyclic voltammetry; SCNFs, sulfur-doped carbon nanofiber; FeV, iron vanadate; Au/N-prGO-CS electrode, chitosan and nitrogen-doped porous reduced graphene oxide onto gold electrode; EIS, electrochemical impedance spectroscopy; DRN-aptamer, daunorubicin-binding aptamer; GQD, graphene quantum dots; PT/ $\beta$ -CD, poly(taurine- $\beta$ -cyclodextrins); BNNS, bird nest-like nano-structure; MB, methylene blue; NiHCF, nickel hexacyanoferrate; Ni-Al-LDH, Ni-Al layered double hydroxides; SWV, square wave voltammetry; LSV, linear sweep voltammetry. Adapted with permission from Elsevier B.V.: Microchemical Journal (Yang et al. 2022), Copyright 2022.

## References

- 1 H. Guo, H. Jin, R. Gui, Z. Wang, J. Xia and F. Zhang, *Sensors and Actuators, B: Chemical*, 2017, **253**, 50–57.
- 2 J. Fei, X. Wen, Y. Zhang, L. Yi, X. Chen and H. Cao, *Microchimica Acta*, 2009, **164**, 85–91.
- 3 J. Soleymani, M. Hasanzadeh, M. Eskandani, M. Khoubnasabjafari, N. Shadjou and A. Jouyban, *Materials Science and Engineering C*, 2017, **77**, 790–802.
- 4 M. Taei, F. Hasanpour, H. Salavati and S. Mohammadian, *Microchimica Acta*, 2016, **183**, 49–56.
- 5 M. H. Ghanbari, F. Shahdost-Fard, H. Salehzadeh, M. R. Ganjali, M. Iman, M. Rahimi-Nasrabadi and F. Ahmadi, *Microchimica Acta*, 2019, **186**, 641.
- 6 F. Yan, J. Chen, Q. Jin, H. Zhou, A. Sailjoi, J. Liu and W. Tang, *Journal of Materials Chemistry C*, 2020, **8**, 7113–7119.
- 7 J. Liu, X. Bo, M. Zhou and L. Guo, *Microchimica Acta*, 2019, **186**, 639.
- 8 E. Er and N. Erk, *Microchimica Acta*, 2020, **187**, 223.
- 9 S. V. Selvi, A. Prasannan, S.-M. Chen, A. Vadivelmurugan, H.-C. Tsai and J.-Y. Lai, *Microchimica Acta*, 2021, **188**, 35.
- 10 U. Rajaji, Y. Kumar, S.-M. Chen, M. S. Raghu, & L. Parashuram, F. M. Alzahrani, N. S. Alsaiari and M. Ouladsmame, *Microchimica Acta*, 2021, **188**, 303.
- 11 M. Hasanzadeh, N. Hashemzadeh, N. Shadjou, J. Eivazi-Ziaei, M. Khoubnasabjafari and A. Jouyban, *Journal of Molecular Liquids*, 2016, **221**, 354–357.
- 12 F. Chekin, V. Myshin, R. Ye, S. Melinte, S. K. Singh, S. Kurungot, R. Boukherroub and S. Szunerits, *Analytical and Bioanalytical Chemistry*, 2019, **411**, 1509–1516.
- 13 N. Bahner, P. Reich, D. Frense, M. Menger, K. Schieke and D. Beckmann, *Analytical and Bioanalytical Chemistry*, 2018, **410**, 1453–1462.
- 14 P. M. Alizadeh, M. Hasanzadeh, J. Soleymani, J. V. Gharamaleki and A. Jouyban, *Microchemical Journal*, 2019, **145**, 450–455.
- 15 A. Porfireva, V. Vorobev, S. Babkina and G. Evtugyn, *Sensors (Switzerland)*, 2019, **19**, 2085.
- 16 M. Rahimi, A. Bagheri Gh. and S. J. Fatemi, *Journal of Electroanalytical Chemistry*, 2019, **848**, 113333.
- 17 T. Madrakian, K. D. Asl, M. Ahmadi and A. Afkhami, *RSC Advances*, 2016, **6**, 72803–72809.
- 18 M. H. Ghanbari and Z. Norouzi, *Microchemical Journal*, 2020, **157**, 105098.
- 19 L. LÜ, *Analytical Sciences*, 2020, **36**, 127–133.

- 20 M. Ehsani, J. Soleymani, P. Mohammadalizadeh, M. Hasanzadeh, A. Jouyban, M. Khoubnasabjafari and Y. Vaez-Gharamaleki, *Microchemical Journal*, 2021, **165**, 106101.
- 21 M. Wang, J. Lin, J. Gong, M. Ma, H. Tang, J. Liu and F. Yan, *RSC Advances*, 2021, **11**, 9021–9028.
- 22 M. Behravan, H. Aghaie, M. Giahi and L. Maleknia, *Diamond and Related Materials*, 2021, **117**, 108478.
- 23 M. Yang, Z. Sun, H. Jin and R. Gui, *Microchemical Journal*, 2022, **177**, 107319.
